# Supplementary material
Source: PubMed Central journal article supplement (PMC10358064)
Supplement: 12672_2012_116_MOESM1_ESM.pdf [file 12672_2012_116_MOESM1_ESM.pdf]

Journal: Hormones and Cancer  
Manuscript # HOCA-D-12-00013

Title: The Cancer BioChip System: A functional genomic assay for anchorage-independent three-dimensional cell growth.

Authors: Rula A. Abbud-Antaki, Joie N. Marhefka, Aimee L. DeLuca, and Michael P. Zuromskis.

Author Affiliation: Falcon Genomics, Inc., 160 North Craig Street, Pittsburgh, PA 15213

Corresponding author e-mail: rabbud@falconggenomics.com

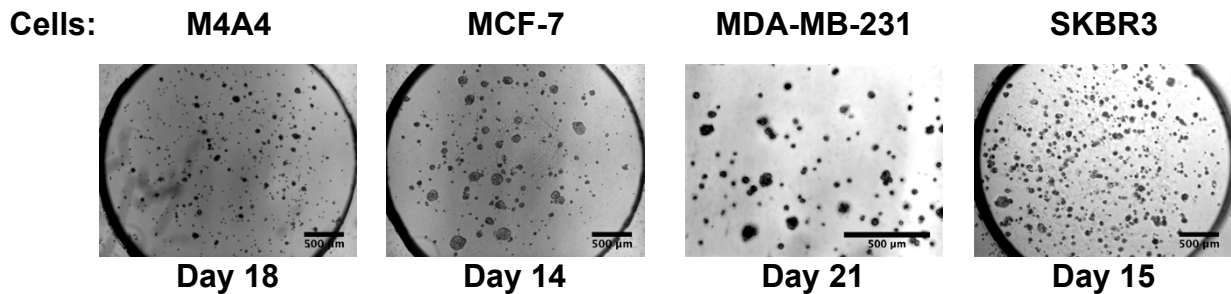

Online Resource 1: Growth of breast cancer cell lines on the CBC-1. Shown are representative merged z-stack images from CBC-1 wells where M4A4, MCF-7, MDA-MB-231, and SKBR3 have been growing for 18, 14, 21, and 15 days, respectively. Colonies appear as *dark blobs*.
